# Supplementary material
Source: ML conference proceedings conference paper supplement (https://proceedings.neurips.cc/paper_files/paper/2021/hash/fa14d4fe2f19414de3ebd9f63d5c0169-Abstract.html)
Supplement: Supplementary file 1 [file fa14d4fe2f19414de3ebd9f63d5c0169-Supplemental.pdf]

---

# Supplementary Material: Unleashing the Power of Contrastive Self-Supervised Visual Models via Contrast-Regularized Fine-Tuning

---

Yifan Zhang<sup>1\*</sup> Bryan Hooi<sup>1</sup> Dapeng Hu<sup>1</sup> Jian Liang<sup>2</sup> Jiashi Feng<sup>3</sup>  
<sup>1</sup>National University of Singapore <sup>2</sup>Chinese Academy of Sciences <sup>3</sup>SEA AI Lab

## Abstract

We provide the supplementary material for our paper “Unleashing the Power of Contrastive Self-Supervised Visual Models via Contrast-Regularized Fine-Tuning” [? ], including proofs for the analysis of the contrastive loss (cf. Appendix A), the pseudo-code of the proposed method (cf. Appendix B), more implementation details (cf. Appendix C), and more empirical results and analysis (cf. Appendix D and Appendix E).

## A Proof of Theoretical Analysis

This appendix provides proofs for both Theorems 1 and 2.

### A.1 Proof for Theorem 1

**Theorem 1** *Assuming the features are  $\ell_2$ -normalized and the classes are balanced with equal data number, minimizing the contrastive loss is equivalent to minimizing the class-conditional entropy  $\mathcal{H}(Z|Y)$  and maximizing the feature entropy  $\mathcal{H}(Z)$ :*

$$\mathcal{L}_{con} \propto \mathcal{H}(Z|Y) - \mathcal{H}(Z)$$

**Proof** We follow the notations in the main paper and further denote the sample set of the class  $k$  by  $\mathcal{Z}_k$ . Moreover, we assume the classes of samples are balanced so that the sample number of each class is constant  $|\mathcal{Z}_k| = \frac{n}{K}$ , where  $n$  denotes the total number of samples and  $K$  indicates the number of classes. Let us start by splitting the contrastive loss into two terms.

$$\begin{aligned} \mathcal{L}_{con} &= -\frac{1}{n} \sum_{i=1}^n \frac{1}{|P_i|} \sum_{z_j \in P_i} \log \frac{e^{(v_i^\top v_j / \tau)}}{\sum_{v_k \in A_i} e^{(v_i^\top v_k / \tau)}} \\ &= -\frac{1}{n} \sum_{i=1}^n \frac{1}{|P_i|} \sum_{z_j \in P_i} \frac{z_i^\top z_j}{\tau} + \frac{1}{n} \sum_{i=1}^n \log \sum_{z_k \in A_i} e^{(\frac{z_i^\top z_k}{\tau})}. \end{aligned} \quad (1)$$

Let  $c_k = \frac{1}{|\mathcal{Z}_k|} \sum_{z \in \mathcal{Z}_k} z$  denote the hard mean of all features from the class  $k$ , and let the symbol  $\stackrel{c}{=}$  indicate equality up to a multiplicative and/or additive constant. We first analyze the first term in

---

\*Corresponding to: Yifan Zhang <yifan.zhang@u.nus.edu>

Eq. (1) by connecting it to a tightness term of the center loss, *i.e.*,  $\sum_{z_i \in \mathcal{Z}_k} \|z_i - c_k\|^2$  [55]:

$$\begin{aligned}
\sum_{z_i, z_j \in \mathcal{Z}_k} -\frac{z_i^\top z_j}{\tau} &\stackrel{c}{=} \frac{1}{|\mathcal{Z}_k|} \sum_{z_i, z_j \in \mathcal{Z}_k} -z_i^\top z_j \\
&\stackrel{c}{=} \frac{1}{|\mathcal{Z}_k|} \sum_{z_i, z_j \in \mathcal{Z}_k} \|z_i\|^2 - z_i^\top z_j \\
&= \sum_{z_i \in \mathcal{Z}_k} \|z_i\|^2 - \frac{1}{|\mathcal{Z}_k|} \sum_{z_i \in \mathcal{Z}_k} \sum_{z_j \in \mathcal{Z}_k} z_i^\top z_j \\
&= \sum_{z_i \in \mathcal{Z}_k} \|z_i\|^2 - 2 \frac{1}{|\mathcal{Z}_k|} \sum_{z_i \in \mathcal{Z}_k} \sum_{z_j \in \mathcal{Z}_k} z_i^\top z_j \\
&\quad + \frac{1}{|\mathcal{Z}_k|} \sum_{z_i \in \mathcal{Z}_k} \sum_{z_j \in \mathcal{Z}_k} z_i^\top z_j \\
&= \sum_{z_i \in \mathcal{Z}_k} \|z_i\|^2 - 2z_i^\top c_k + \|c_k\|^2 \\
&= \sum_{z_i \in \mathcal{Z}_k} \|z_i - c_k\|^2,
\end{aligned}$$

where we use the property of  $\ell_2$ -normalized features that  $\|z_i\|^2 = \|z_j\|^2 = 1$  and the definition of the class hard mean  $c_k = \frac{1}{|\mathcal{Z}_k|} \sum_{z \in \mathcal{Z}_k} z$ .

By summing over all classes  $k$ , we obtain:

$$\sum_{i=1}^n \sum_{z_j \in P_i} -\frac{z_i^\top z_j}{\tau} \stackrel{c}{=} \sum_{i=1}^n \|z_i - c_{y_i}\|^2.$$

Based on this equation, following [1], we can interpret the first term in Eq. (1) as a conditional cross-entropy between  $Z$  and another random variable  $\bar{Z}$ , whose conditional distribution given  $Y$  is a standard Gaussian centered around  $c_Y: \bar{Z}|Y \sim \mathcal{N}(c_y, i)$ :

$$-\frac{1}{n} \sum_{i=1}^n \frac{1}{|P_i|} \sum_{z_j \in P_i} \frac{z_i^\top z_j}{\tau} \stackrel{c}{=} \mathcal{H}(Z; \bar{Z}|Y) = \mathcal{H}(Z|Y) + \mathcal{D}_{KL}(Z||\bar{Z}|Y).$$

Based on this, we know that the first term in Eq. (1) is an upper bound on the conditional entropy of features  $Z$  given labels  $Y$ :

$$-\frac{1}{n} \sum_{i=1}^n \frac{1}{|P_i|} \sum_{z_j \in P_i} \frac{z_i^\top z_j}{\tau} \stackrel{c}{\geq} \mathcal{H}(Z|Y).$$

where the symbol  $\stackrel{c}{\geq}$  indicates ‘‘larger than’’ up to a multiplicative and/or an additive constant. When  $Z|Y \sim \mathcal{N}(c_y, i)$ , the bound is tight. As a result, minimizing the first term in Eq. (1) is equivalent to minimizing  $\mathcal{H}(Z|Y)$ :

$$-\frac{1}{n} \sum_{i=1}^n \frac{1}{|P_i|} \sum_{z_j \in P_i} \frac{z_i^\top z_j}{\tau} \propto \mathcal{H}(Z|Y). \tag{2}$$

This concludes the proof for the relationship of the first term in Eq. (1).

We then analyze the second term in Eq. (1), which has the following relationship:

$$\begin{aligned}
& \frac{1}{n} \sum_{i=1}^n \log \sum_{z_k \in A_i} e^{\left(\frac{z_i^\top z_k}{\tau}\right)} \\
&= \frac{1}{n} \sum_{i=1}^n \log \left( \sum_{k: y_i = y_k} e^{\left(\frac{z_i^\top z_k}{\tau}\right)} + \sum_{k: y_i \neq y_k} e^{\left(\frac{z_i^\top z_k}{\tau}\right)} \right) \\
&\geq \frac{1}{n} \sum_{i=1}^n \log \left( \sum_{k: y_i \neq y_k} e^{\left(\frac{z_i^\top z_k}{\tau}\right)} \right) \\
&\stackrel{c}{\geq} \frac{1}{n} \sum_{i=1}^n \sum_{k: y_i \neq y_k} \frac{z_i^\top z_k}{\tau} \\
&= \frac{1}{n} \sum_{i=1}^n \sum_{k=1}^n \frac{z_i^\top z_k}{\tau} - \frac{1}{n} \sum_{i=1}^n \sum_{k: y_i = y_k} \frac{z_i^\top z_k}{\tau} \\
&\stackrel{c}{=} -\frac{1}{n} \sum_{i=1}^n \sum_{k=1}^n \|z_i - z_k\|^2 - \frac{1}{n} \sum_{i=1}^n \sum_{k: y_i = y_k} \frac{z_i^\top z_k}{\tau}, \tag{3}
\end{aligned}$$

where we use Jensen's inequality in the fourth line. The first term in Eq. (3) is close to the differential entropy estimator of features  $Z$  provided by [? ]:

$$\hat{\mathcal{H}}(Z) = \frac{d}{n(n-1)} \sum_{i=1}^n \sum_{k=1}^n \log \|z_i - z_k\|^2 \stackrel{c}{=} \frac{1}{n} \sum_{i=1}^n \sum_{k=1}^n \log \|z_i - z_k\|^2 \propto \frac{1}{n} \sum_{i=1}^n \sum_{k=1}^n \|z_i - z_k\|^2, \tag{4}$$

where  $d$  is the dimension of features. Combining Eq. (3) and Eq. (4) leads to:

$$\frac{1}{n} \sum_{i=1}^n \log \sum_{z_k \in A_i} e^{\left(\frac{z_i^\top z_k}{\tau}\right)} \stackrel{c}{\geq} -\mathcal{H}(Z) - \frac{1}{n} \sum_{i=1}^n \sum_{k: y_i = y_k} \frac{z_i^\top z_k}{\tau}. \tag{5}$$

The second term in the right side of Eq. (5) is essentially a redundant term with the first term in Eq. (1), so we ignore it here. Then, we know that minimizing the second term in Eq. (1) is equivalent to maximizing  $\mathcal{H}(Z)$ :

$$\frac{1}{n} \sum_{i=1}^n \log \sum_{z_k \in A_i} e^{\left(\frac{z_i^\top z_k}{\tau}\right)} \propto -\mathcal{H}(Z). \tag{6}$$

Combining Eq. (2) and Eq. (6), we conclude the proof of Theorem 1.  $\square$

## A.2 Proof for Theorem 2

**Theorem 2** *Assuming the features are  $\ell_2$ -normalized and the classes are balanced, the contrastive loss is positive proportional to the infimum of conditional cross-entropy  $\mathcal{H}(Y; \hat{Y}|Z)$ , where the infimum is taken over classifiers:*

$$\mathcal{L}_{con} \propto \inf_{\text{Classifier}} \underbrace{\mathcal{H}(Y; \hat{Y}|Z)}_{\text{Conditional CE}} - \mathcal{H}(Y)$$

**Proof** The mutual information between features  $Z$  and labels  $Y$  can be defined in two ways:

$$\mathcal{I}(Z; Y) = \mathcal{H}(Y) - \mathcal{H}(Y|Z) = \mathcal{H}(Z) - \mathcal{H}(Z|Y). \tag{7}$$

Based on Theorem 1, we know that:

$$\mathcal{L}_{con} \propto \mathcal{H}(Z|Y) - \mathcal{H}(Z) = -\mathcal{I}(Z; Y). \tag{8}$$

Combining Eq. (7) and Eq. (8), we have:

$$\mathcal{L}_{con} \propto \mathcal{H}(Y|Z) - \mathcal{H}(Y). \tag{9}$$

Then, we relate the conditional entropy  $\mathcal{H}(Y|Z)$  to the cross entropy loss:

$$\mathcal{H}(Y; \hat{Y}|Z) = \mathcal{H}(Y|Z) + \mathcal{D}_{KL}(Y \parallel \hat{Y}|Z). \quad (10)$$

According to Eq. (10), when we minimize cross-entropy  $\mathcal{H}(Y; \hat{Y}|Z)$ , we implicitly minimize both  $\mathcal{H}(Y|Z)$  and  $\mathcal{D}_{KL}(Y \parallel \hat{Y}|Z)$ . In fact, the optimization could be decoupled into 2 steps in a maximize-minimize (or bound-optimization) way [1]. The first step fixes the parameters of the network encoder and only minimizes Eq. (10) with respect to the parameters of the network classifier. As this step,  $\mathcal{H}(Y|Z)$  is fixed and the predictions  $\hat{Y}$  are adjusted to minimize  $\mathcal{D}_{KL}(Y \parallel \hat{Y}|Z)$ . Ideally,  $\mathcal{D}_{KL}(Y \parallel \hat{Y}|Z)$  would vanish at the end of this step [1]. In this sense, we know that:

$$\mathcal{H}(Y|Z) = \inf \mathcal{H}(Y; \hat{Y}|Z). \quad (11)$$

The second step fixes the classifier and minimizes Eq. (10) with respect to the encoder. By combining Eq. (9) and Eq. (11), we conclude the proof of Theorem 2.  $\square$

## B Pseudo-code of Core-tuning

We summarize the scheme of Core-tuning in Algorithm 1. Here, all hard pair generation is conducted within each sample batch.

---

**Algorithm 1** The training scheme of Core-tuning.

---

**Require:** Pre-trained encoder  $G_e$ ; Loss factor  $\eta$ ; Mixup factor  $\alpha$ ; Batch size  $B$ ; Epoch number  $T$ .

**Ensure:** Classifier  $G_y$ ; Projection head  $G_c$ .

- 1: **for**  $t=1, \dots, T$  **do**
- 2:   Sample a batch of training data  $\{(x_i, y_i)\}_{i=1}^B$ ;
- 3:   Obtain features  $z_i = G_e(x_i)$  for each sample;
- 4:   **for**  $i=1, \dots, B$  **do**
- 5:     Construct positive pair set  $P_i$  and full pair set  $A_i$  for  $z_i$ ;
- 6:     Generate hard positive pair  $(z_i^+, y_i^+)$  and add it to  $P_i, A_i$ ;
- 7:     Generate hard negative pair  $(z_i^-, y_i^-)$  and add it to  $A_i$ ;
- 8:   **end for**
- 9:   Obtain contrastive features  $v_i = G_c(z_i)$  for all features;
- 10:   Compute the focal contrastive loss  $\mathcal{L}_{con}^f$ ;
- 11:   Predict  $\hat{y}_i = G_y(z_i)$  for the original and generated samples;
- 12:   Compute the cross-entropy loss  $\mathcal{L}_{ce}^m$ ;
- 13:   loss.backward();   // loss =  $\mathcal{L}_{ce}^m + \eta \mathcal{L}_{con}^f$ .
- 14: **end for**

---

## C More Experimental Details

### C.1 Implementation Details of Feature Visualization

In the feature visualization, we train ResNet-18 on CIFAR10 with two kinds of losses, *i.e.*, (1) cross-entropy  $\mathcal{L}_{ce}$ ; (2) cross-entropy and the contrastive loss  $\mathcal{L}_{ce} + \mathcal{L}_{con}$ . For better visualization, following [? ], we add two fully connected layers before the classifier. The two layers first map the 512-dimensional features to a 3-dimensional feature sphere and then map back to the 10-dimensional feature space for prediction. The contrastive loss  $\mathcal{L}_{con}$  is enforced on the 3-dimensional features. After training, we visualize the 3-dimensional features learned by ResNet-18 in MATLAB.

### C.2 More Details of Image Classification

**Dataset details.** Following [27], we test on 9 natural image datasets, including ImageNet20 (a subset of ImageNet with 20 classes) [11], CIFAR10, CIFAR100 [29], Caltech-101 [15], DTD [10], FGVC Aircraft [39], Standard Cars [28], Oxford-IIIT Pets [44] and Oxford 102 Flowers [42]. In addition, considering real-world datasets may be class-imbalanced [67, 68? ?, 70], we also evaluate Core-tuning on the iNaturalist18 dataset [50]. Most datasets are obtained from their official websites, except ImageNet20 and Oxford 102 Flowers. The ImageNet20 dataset is obtained by combining two open-source ImageNet subsets with 10 classes, *i.e.*, ImageNette and ImageWoof [21]. Moreover, Oxford 102 Flowers is obtained from Kaggle<sup>2</sup>. These datasets cover a wide range of classification tasks, including coarse-grained object classification (*i.e.*, ImageNet20, CIFAR, Caltech-101), fine-grained object classification (*i.e.*, Cars, Aircraft, Pets) and texture classification (*i.e.*, DTD). The statistics of all datasets are reported in Table 1.

Table 1: Statistics of datasets.

| DataSet                         | #Classes | # Training | # Test |
|---------------------------------|----------|------------|--------|
| ImageNet20 [21, 11]             | 20       | 18,494     | 7,854  |
| CIFAR10 [29]                    | 10       | 50,000     | 10,000 |
| CIFAR100 [29]                   | 100      | 50,000     | 10,000 |
| Caltech-101 [15]                | 102      | 3,060      | 6,084  |
| Describable Textures (DTD) [10] | 47       | 3,760      | 1,880  |
| FGVG Aircraft [39]              | 100      | 6,667      | 3,333  |
| Standard Cars [28]              | 196      | 8,144      | 8,041  |
| Oxford-IIIT Pets [44]           | 37       | 3,680      | 3,369  |
| Oxford 102 Flowers [42]         | 102      | 6,552      | 818    |
| iNaturalist18 [50]              | 8,142    | 437,513    | 24,426 |

**Implementation details.** We implement all methods in PyTorch. All checkpoints of self-supervised models are provided by the authors or by the PyContrast GitHub repository<sup>3</sup>. For most datasets, following [6, 27], we preprocess images via random resized crops to  $224 \times 224$  and flips. At the test time, we resize images to  $256 \times 256$  and then take a  $224 \times 224$  center crop. In such a setting, however, we find it difficult to reproduce the performance of some CSL models [6]. Therefore, for some datasets (*e.g.*, CIFAR10 and Aircraft), we resize images to different scales and use rotation augmentations. Although the preprocessing of some datasets is slightly different from [6], the results in this paper are obtained with the same preprocessing method *w.r.t.* each dataset and thus are fair.

Following [27], we initialize networks with the checkpoints of contrastive self-supervised models. For most datasets, we fine-tune networks for 100 epochs using Nesterov momentum via the cosine learning rate schedule. For ImageNet20, we fine-tune networks using stochastic gradient descent via the linear learning rate decay. For iNaturalist18, we fine-tune networks for 160 epochs. For all datasets, the momentum parameter is set to 0.9, while the factor of weight decay is set to  $10^{-4}$ . As for Core-tuning, we set the clipping thresholds of hard negative generation to be  $\lambda_n=0.8$  and the temperature  $\tau=0.07$ . The dimension of the contrastive features is 256 and the depth of non-linear projection is 2 layers. Following [6], we perform hyper-parameter tuning for each dataset. Specifically, we select the batch size from  $\{64, 128, 256\}$ , the initial learning rate from  $\{0.01, 0.1\}$  and  $\eta/\alpha$  from  $\{0.1, 1, 10\}$ . The experiments are conducted on 4 TITAN RTX 2080 GPUs for iNaturalist18, and 1 GPU for all other datasets. All results are averaged over 3 runs. We adopt the top-1 accuracy as the metric. The statistics of the used hyper-parameters are provided in Table 2. For other baselines, we use the same training setting for each dataset, and tune their hyper-parameters as best as possible.

<sup>2</sup><https://www.kaggle.com/c/oxford-102-flower-pytorch>.

<sup>3</sup><https://github.com/HobbitLong/PyContrast>

Table 2: Statistics of the used hyper-parameters in Core-tuning.

| Hyper-parameter              | ImageNet20 | CIFAR10      | CIFAR100 | Caltech101 | DTD  | Aircraft | Cars | Pets | Flowers | iNarutalist18 |
|------------------------------|------------|--------------|----------|------------|------|----------|------|------|---------|---------------|
| epochs                       | 100        |              |          |            |      |          |      |      |         |               |
| batch size                   | 256        | 256          | 256      | 256        | 256  | 64       | 64   | 64   | 64      | 128           |
| loss trade-off factor $\eta$ | 0.1        | 0.1          | 1        | 1          | 0.1  | 0.1      | 0.1  | 0.1  | 1       | 10            |
| mixup factor $\alpha$        | 1          | 1            | 0.1      | 0.1        | 1    | 0.1      | 0.1  | 1    | 0.1     | 1             |
| learning rate (lr)           | 0.1        | 0.01         | 0.01     | 0.01       | 0.01 | 0.01     | 0.01 | 0.01 | 0.01    | 0.1           |
| lr schedule                  | linear     | cosine decay |          |            |      |          |      |      |         |               |
| temperature $\tau$           | 0.07       |              |          |            |      |          |      |      |         |               |
| threshold $\lambda_n$        | 0.8        |              |          |            |      |          |      |      |         |               |
| weight decay factor          | $10^{-4}$  |              |          |            |      |          |      |      |         |               |
| momentum factor              | 0.9        |              |          |            |      |          |      |      |         |               |
| projection dimension         | 256        |              |          |            |      |          |      |      |         |               |
| projection depth             | 2 layers   |              |          |            |      |          |      |      |         |               |

### C.3 More Details of Domain Generalization

**Dataset details.** We use 3 benchmark datasets, *i.e.*, PACS [32], VLCS [14] and Office-Home [51]. The data statistics are shown in Table 3, where each dataset has 4 domains. In each setting, we select 3 domains to fine-tune the networks and then test on the rest of the unseen domains. The key challenge is the distribution discrepancies among domains, leading to poor performance of neural networks on the target domain [? ? ? ? ?].

Table 3: Statistics of datasets.

| DataSet     | #Domains | #Classes | #Samples | Size of images |
|-------------|----------|----------|----------|----------------|
| PACS        | 4        | 7        | 9,991    | (3,224,224)    |
| VLCS        | 4        | 5        | 10,729   | (3,224,224)    |
| Office-Home | 4        | 65       | 15,588   | (3,224,224)    |

**Implementation details.** The overall scheme of Core-tuning for domain generalization is shown in Figure 1. The experiments are implemented based on the DomainBed repository [?] in PyTorch. During fine-tuning, we preprocess images through random resized crops to  $224 \times 224$ , horizon flips, color jitter and random gray scale. At the test time, we directly resize images to  $224 \times 224$ . We initialize ResNet-50 with the weights of the MoCo-v2 pre-trained model, and fine-tune it for 20,000 steps at a batch size of 32 using the Adam optimizer on a single TITAN RTX 2080 GPU. We set the initial learning rate to  $5 \times 10^{-5}$  and adjust it via the exponential learning rate decay. All other hyper-parameters of Core-tuning are the same as image classification. Besides, we use Accuracy as the metric in domain generalization.

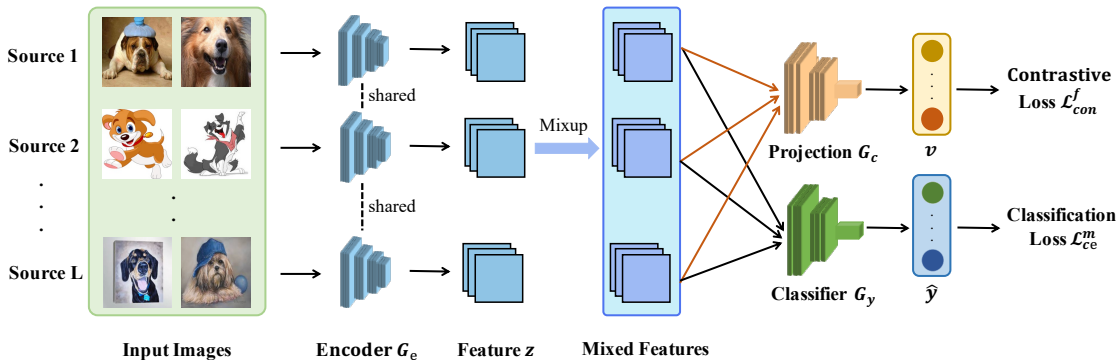

Figure 1: The overall scheme of Core-tuning in the setting of cross-domain generalization.

### C.4 Implementation Details of Robustness Training

We conduct this experiment in PyTorch. We take Caltech-101, DTD, Pets, and CIFAR10 as datasets, whose preprocessing are the same as the ones in image classification. We use MoCo-v2 pre-trained ResNet-50 as the backbone, and use Projected Gradient Descent (PGD) [38] to generate adversarial samples. During adversarial training (AT), we use both clean and adversarial samples for training with various fine-tuning methods on a single TITAN RTX 2080 GPU. Other training schemes (*e.g.*, the optimizer, the hyper-parameters, the learning rate scheme) are the same as image classification.

## D More Experimental Results

### D.1 More Results on Domain Generalization

This appendix further reports the results of domain generalization on OfficeHome. The observations from Table 4 are same to the main text. First, when fine-tuning with cross-entropy, the contrastive self-supervised model performs worse than the supervised pre-trained model. This results from the relatively worse discriminative abilities of the contrastive self-supervised model, which can also be found in Table 1 of the main paper. Second, enforcing contrastive regularizer during fine-tuning improves domain generalization performance, since the contrastive regularizer helps to learn more discriminative features (cf. Theorem 1) and also helps to alleviate distribution shifts among domains [24], hence leading to better performance. Last, Core-tuning further improves the generalization performance of models on all datasets. This is because hard pair generation further boosts contrastive learning, while smooth classifier learning also benefits model generalizability. We thus conclude that Core-tuning improves model generalization on downstream tasks.

Table 4: Domain generalization accuracies of various fine-tuning methods for MoCo-v2 pre-trained ResNet-50 the on Office-Home dataset. CE means cross-entropy; CE-Con enhances CE with the contrastive loss. Here, A/C/P/R are four domains in Office-Home.

| Pre-training | Fine-tuning | Office-Home  |              |              |              |              |
|--------------|-------------|--------------|--------------|--------------|--------------|--------------|
|              |             | A            | C            | P            | R            | Avg.         |
| Supervised   | CE          | 56.08        | 50.83        | 72.49        | 75.21        | 63.82        |
| MoCo-v2      | CE          | 50.31        | 48.91        | 64.72        | 68.76        | 58.18        |
|              | CE-Con      | 55.87        | 50.23        | 71.51        | 74.99        | 63.15        |
|              | ours        | <b>58.70</b> | <b>52.43</b> | <b>72.89</b> | <b>75.36</b> | <b>64.85</b> |

### D.2 More Results on Adversarial Training

In the main paper, we apply Core-tuning to adversarial training on CIFAR10, while this appendix further provides the results of adversarial training on three other natural image datasets, *i.e.*, Caltech-101, DTD and Pets. We draw several observations based on the results on 3 image datasets in Table 5. First, despite good clean accuracy, standard fine-tuning with cross-entropy cannot defend against adversarial attack, leading to poor robust accuracy. Second, AT with cross-entropy improves the robust accuracy significantly, but it inevitably degrades the clean accuracy due to the accuracy-robustness trade-off [49]. In contrast, the contrastive regularizer improves both robust and clean accuracies. This is because contrastive learning helps to improve robustness generalization (*i.e.*, alleviating the distribution shifts between clean samples and adversarial samples), thus leading to better performance. Last, Core-tuning further boosts AT and, surprisingly, even achieves better clean accuracy than the standard fine-tuning under the  $\ell_2$  attack. To our knowledge, this is quite promising since even the most advanced AT methods [61, 65] find it difficult to conquer the accuracy-robustness trade-off [63]. The improvement is mainly derived from that both contrastive learning and smooth classifier learning boost the robustness generalization. We thus conclude that Core-tuning is beneficial to model robustness. We also hope that Core-tuning can motivate people to rethink the accuracy-robustness trade-off in adversarial training in the future.

Table 5: Adversarial training performance of MoCo-v2 pre-trained ResNet-50 under the attack of PGD-10 in terms of robust and clean accuracies. CE indicates cross-entropy; AT-CE indicates adversarial training (AT) with CE; AT-CE-Con enhances AT-CE with the contrastive loss; AT-ours uses Core-tuning for AT.

| Method    | PGD - $\ell_2$ attack ( $\epsilon = 0.5$ ) |              |              |              |              |              | PGD - $\ell_\infty$ attack ( $\epsilon = 4/255$ ) |              |              |              |              |              |
|-----------|--------------------------------------------|--------------|--------------|--------------|--------------|--------------|---------------------------------------------------|--------------|--------------|--------------|--------------|--------------|
|           | Caltech101                                 |              | DTD          |              | Pets         |              | Caltech101                                        |              | DTD          |              | Pets         |              |
|           | Robust                                     | Clean        | Robust       | Clean        | Robust       | Clean        | Robust                                            | Clean        | Robust       | Clean        | Robust       | Clean        |
| CE        | 55.69                                      | 91.87        | 42.25        | 71.68        | 30.94        | 89.05        | 27.03                                             | <b>91.87</b> | 18.37        | <b>71.68</b> | 4.63         | <b>89.05</b> |
| AT-CE     | 87.35                                      | 91.61        | 61.93        | 68.81        | 78.67        | 86.25        | 78.61                                             | 90.65        | 47.27        | 67.13        | 63.59        | 84.21        |
| AT-CE-Con | 88.67                                      | 92.61        | 64.75        | 71.24        | 79.53        | 87.01        | 79.87                                             | 91.08        | 48.95        | 69.07        | 65.60        | 86.85        |
| AT-ours   | <b>89.21</b>                               | <b>92.83</b> | <b>66.49</b> | <b>72.94</b> | <b>82.54</b> | <b>89.22</b> | <b>80.73</b>                                      | 91.64        | <b>49.43</b> | 70.65        | <b>67.98</b> | 87.20        |

### D.3 More Results on Image Classification

**The results with standard errors.** In the main paper, we report the results of image classification and ablations studies on 9 natural image datasets in terms of the average accuracy. To make the results more complete, this appendix further reports the results with their standard errors (cf. Tables 6-7).

Table 6: Comparisons of various fine-tuning methods for MoCo-v2 pre-trained ResNet-50 on image classification in terms of top-1 accuracy. Here, ‘‘Avg.’’ indicates the average accuracy over 9 datasets. SL-CE-tuning denotes supervised pre-training on ImageNet and then fine-tuning with cross-entropy.

| Algorithm      | ImageNet20          | CIFAR10             | CIFAR100            | Caltech101          | DTD                 |
|----------------|---------------------|---------------------|---------------------|---------------------|---------------------|
| SL-CE-tuning   | 91.01+/-1.27        | 94.23+/-0.07        | 83.40+/-0.12        | 93.65+/-0.21        | 74.40+/-0.45        |
| CE-tuning      | 88.28+/-0.47        | 94.70+/-0.39        | 80.27+/-0.60        | 91.87+/-0.18        | 71.68+/-0.53        |
| L2SP [35]      | 88.49+/-0.40        | 95.14+/-0.22        | 81.43+/-0.22        | 91.98+/-0.07        | 72.18+/-0.61        |
| M&M [62]       | 88.53+/-0.21        | 95.02+/-0.07        | 80.58+/-0.19        | 92.91+/-0.08        | 72.43+/-0.43        |
| DELTA [33]     | 88.35+/-0.41        | 94.76+/-0.05        | 80.39+/-0.41        | 92.19+/-0.45        | 72.23+/-0.23        |
| BSS [9]        | 88.34+/-0.62        | 94.84+/-0.21        | 80.40+/-0.30        | 91.95+/-0.12        | 72.22+/-0.17        |
| RIFLE [34]     | 89.06+/-0.28        | 94.71+/-0.13        | 80.36+/-0.07        | 91.94+/-0.23        | 72.45+/-0.30        |
| SCL [18]       | 89.29+/-0.07        | 95.33+/-0.09        | 81.49+/-0.27        | 92.84+/-0.03        | 72.73+/-0.31        |
| Bi-tuning [71] | 89.06+/-0.08        | 95.12+/-0.15        | 81.42+/-0.01        | 92.83+/-0.06        | 73.53+/-0.37        |
| Core-tuning    | <b>92.73+/-0.17</b> | <b>97.31+/-0.10</b> | <b>84.13+/-0.27</b> | <b>93.46+/-0.06</b> | <b>75.37+/-0.37</b> |

  

| Algorithm      | Aircraft            | Cars                | Pets                | Flowers             | Avg.         |
|----------------|---------------------|---------------------|---------------------|---------------------|--------------|
| SL-CE-tuning   | 87.03+/-0.02        | 89.77+/-0.11        | 92.17+/-0.12        | 98.78+/-0.10        | 89.35        |
| CE-tuning      | 86.87+/-0.18        | 88.61+/-0.43        | 89.05+/-0.01        | 98.49+/-0.06        | 87.76        |
| L2SP [35]      | 86.55+/-0.30        | 89.00+/-0.23        | 89.43+/-0.27        | 98.66+/-0.20        | 88.10        |
| M&M [62]       | 87.45+/-0.28        | 88.90+/-0.70        | 89.60+/-0.09        | 98.57+/-0.15        | 88.22        |
| DELTA [33]     | 87.05+/-0.37        | 88.73+/-0.05        | 89.54+/-0.48        | 98.65+/-0.17        | 87.99        |
| BSS [9]        | 87.18+/-0.71        | 88.50+/-0.02        | 89.50+/-0.42        | 98.57+/-0.15        | 87.94        |
| RIFLE [34]     | 87.60+/-0.50        | 89.72+/-0.11        | 90.05+/-0.26        | 98.70+/-0.06        | 88.29        |
| SCL [18]       | 87.44+/-0.31        | 89.37+/-0.13        | 89.71+/-0.20        | 98.65+/-0.10        | 88.54        |
| Bi-tuning [71] | 87.39+/-0.01        | 89.41+/-0.28        | 89.90+/-0.06        | 98.57+/-0.10        | 88.58        |
| Core-tuning    | <b>89.48+/-0.17</b> | <b>90.17+/-0.03</b> | <b>92.36+/-0.14</b> | <b>99.18+/-0.15</b> | <b>90.47</b> |

Table 7: Ablation studies of Core-tuning (Row 5) for fine-tuning MoCo-v2 pre-trained ResNet-50 on 9 natural image datasets in terms of top-1 accuracy. Here, ‘‘Avg.’’ indicates the average accuracy over the 9 datasets. Besides,  $\mathcal{L}_{con}$  is the original supervised contrastive loss, while  $\mathcal{L}_{con}^f$  is our focal contrastive loss. Moreover, ‘‘mix’’ denotes the manifold mix, while ‘‘mix-H’’ indicates the proposed hardness-directed mixup strategy in our method.

| $\mathcal{L}_{ce}$ | $\mathcal{L}_{con}$ | $\mathcal{L}_{con}^f$ | mix | mix-H | ImageNet20          | CIFAR10             | CIFAR100            | Caltech101          | DTD                 |
|--------------------|---------------------|-----------------------|-----|-------|---------------------|---------------------|---------------------|---------------------|---------------------|
| ✓                  |                     |                       |     |       | 88.28+/-0.47        | 94.70+/-0.39        | 80.27+/-0.60        | 91.87+/-0.18        | 71.68+/-0.53        |
| ✓                  | ✓                   |                       |     |       | 89.29+/-0.07        | 95.33+/-0.09        | 81.49+/-0.27        | 92.84+/-0.03        | 72.73+/-0.31        |
| ✓                  |                     |                       | ✓   |       | 90.67+/-0.09        | 95.43+/-0.20        | 81.03+/-0.11        | 92.68+/-0.06        | 73.31+/-0.40        |
| ✓                  | ✓                   |                       |     | ✓     | 92.20+/-0.15        | 97.01+/-0.10        | 83.89+/-0.20        | 93.22+/-0.18        | 74.78+/-0.31        |
| ✓                  |                     | ✓                     |     | ✓     | <b>92.73+/-0.17</b> | <b>97.31+/-0.10</b> | <b>84.13+/-0.27</b> | <b>93.46+/-0.06</b> | <b>75.37+/-0.37</b> |

  

| $\mathcal{L}_{ce}$ | $\mathcal{L}_{con}$ | $\mathcal{L}_{con}^f$ | mix | mix-H | Aircraft            | Cars                | Pets                | Flowers             | Avg.         |
|--------------------|---------------------|-----------------------|-----|-------|---------------------|---------------------|---------------------|---------------------|--------------|
| ✓                  |                     |                       |     |       | 86.87+/-0.18        | 88.61+/-0.43        | 89.05+/-0.01        | 98.49+/-0.06        | 87.76        |
| ✓                  | ✓                   |                       |     |       | 87.44+/-0.31        | 89.37+/-0.13        | 89.71+/-0.20        | 98.65+/-0.10        | 88.54        |
| ✓                  |                     |                       | ✓   |       | 88.37+/-0.14        | 89.06+/-0.14        | 91.37+/-0.03        | 98.74+/-0.11        | 88.96        |
| ✓                  | ✓                   |                       |     | ✓     | 88.88+/-0.34        | 89.79+/-0.12        | 91.95+/-0.33        | 98.94+/-0.12        | 90.07        |
| ✓                  |                     | ✓                     |     | ✓     | <b>89.48+/-0.17</b> | <b>90.17+/-0.03</b> | <b>92.36+/-0.14</b> | <b>99.18+/-0.15</b> | <b>90.47</b> |

**The fine-tuning results on ImageNet.** Since ImageNet has rich labeled samples for fine-tuning and the CSL models are also pre-trained on ImageNet, the performance gain of different fine-tuning methods may not vary as significantly as on the small-scale target datasets. Even so, the results in Table 8 also demonstrate the effectiveness of Core-tuning on very large-scale data.

Table 8: Fine-tuning results of the MoCo-v2 ResNet-50 fine-tuned by various methods, on ImageNet.

| Pre-training | Fine-tuning           | Top-1 accuracy |
|--------------|-----------------------|----------------|
| MoCo-v2 [8]  | CE-tuning             | 76.82          |
| MoCo-v2 [8]  | CE-Contrastive-tuning | 77.13          |
| MoCo-v2 [8]  | Core-tuning (ours)    | <b>77.43</b>   |



**More results on different pre-training methods.** This appendix provides the fine-tuning results of Core-tuning for the SimCLR pre-trained models. Since the official checkpoints of SimCLR-v1 [6] and SimCLR-v2 [7] are based on Tensorflow, we convert them to the PyTorch and try to reproduce cross-entropy tuning (CE-tuning) in our experimental settings. Note that although the reproduction performance of CE-tuning is slightly worse than the original paper [6, 7], the results in this paper are obtained with the same preprocessing method *w.r.t.* each dataset and thus are fair. As shown in Table 9, Core-tuning consistently outperforms CE-tuning for SimCLR pre-trained models.

Table 9: Fine-tuning results of ResNet-50, pre-trained by various methods.

| Pre-training  | Caltech101   |                     | DTD          |                     | Pets         |                     |
|---------------|--------------|---------------------|--------------|---------------------|--------------|---------------------|
|               | CE-tuning    | ours                | CE-tuning    | ours                | CE-tuning    | ours                |
| SimCLR-v1 [6] | 90.53+/-0.06 | <b>92.40+/-0.06</b> | 90.53+/-0.06 | <b>71.26+/-0.05</b> | 89.34+/-0.46 | <b>90.89+/-0.09</b> |
| SimCLR-v2 [7] | 92.44+/-0.18 | <b>93.46+/-0.02</b> | 71.26+/-0.26 | <b>74.75+/-0.41</b> | 88.28+/-0.26 | <b>90.64+/-0.31</b> |

**The results on linear evaluation.** This appendix provides linear evaluation for Core-tuning. Specifically, we first fine-tune the MoCo-v2 pre-trained ResNet-50 with Core-tuning and then train a linear classifier for prediction. As shown in Table 10, Core-tuning performs better than CE-tuning.

Table 10: Results of linear evaluation for the ResNet-50 fine-tuned by various methods, on CIFAR10.

| Pre-training | Fine-tuning        | Top-1 accuracy      |
|--------------|--------------------|---------------------|
| MoCo-v2 [8]  | CE-tuning          | 94.78+/-0.28        |
| MoCo-v2 [8]  | Core-tuning (ours) | <b>97.09+/-0.14</b> |

**The results on KNN evaluation.** This appendix provides the KNN evaluation for Core-tuning. To be specific, we first fine-tune the MoCo-v2 pre-trained ResNet-50 with Core-tuning and then use KNN for prediction. As shown in Table 11, Core-tuning also outperforms CE-tuning.

Table 11: Results of KNN evaluation for the ResNet-50 fine-tuned by various methods, on CIFAR10.

| Pre-training | Fine-tuning        | Top-1 accuracy      |
|--------------|--------------------|---------------------|
| MoCo-v2 [8]  | CE-tuning          | 94.63+/-0.32        |
| MoCo-v2 [8]  | Core-tuning (ours) | <b>96.65+/-0.06</b> |

#### D.4 The Results with Standard Errors on Semantic Segmentation

In the main paper, we report the average results of semantic segmentation on PASCAL VOC. This appendix further reports the results with their standard errors (cf. Table 12).

Table 12: Fine-tuning performance on PASCAL VOC semantic segmentation based on DeepLab-V3 with ResNet-50, pre-trained by various CSL methods. CE indicates cross-entropy.

| Pre-training  | Fine-tuning | MPA                 | FWIoU               | MIoU                |
|---------------|-------------|---------------------|---------------------|---------------------|
| Supervised    | CE          | 87.10+/-0.20        | 89.12+/-0.17        | 76.52+/-0.34        |
| InsDis [58]   | CE          | 83.64+/-0.12        | 88.23+/-0.08        | 74.14+/-0.21        |
|               | ours        | <b>84.53+/-0.31</b> | <b>88.67+/-0.07</b> | <b>74.81+/-0.13</b> |
| PIRL [41]     | CE          | 83.16+/-0.26        | 88.22+/-0.24        | 73.99+/-0.42        |
|               | ours        | <b>85.30+/-0.24</b> | <b>88.95+/-0.08</b> | <b>75.49+/-0.36</b> |
| MoCo-v1 [20]  | CE          | 84.71+/-0.56        | 88.75+/-0.04        | 74.94+/-0.12        |
|               | ours        | <b>85.70+/-0.32</b> | <b>89.19+/-0.02</b> | <b>75.94+/-0.23</b> |
| MoCo-v2 [8]   | CE          | 87.31+/-0.31        | 90.26+/-0.12        | 78.42+/-0.28        |
|               | ours        | <b>88.76+/-0.34</b> | <b>90.75+/-0.04</b> | <b>79.62+/-0.12</b> |
| SimCLR-v2 [7] | CE          | 87.37+/-0.48        | 90.27+/-0.12        | 78.16+/-0.19        |
|               | ours        | <b>87.95+/-0.20</b> | <b>90.71+/-0.13</b> | <b>79.15+/-0.33</b> |
| InfoMin [47]  | CE          | 87.17+/-0.20        | 89.84+/-0.09        | 77.84+/-0.24        |
|               | ours        | <b>88.92+/-0.36</b> | <b>90.65+/-0.09</b> | <b>79.48+/-0.30</b> |

## E More Analysis of Core-tuning

### E.1 Analysis of Projection Dimension and Depth

In previous experiments, we use a 2-layer MLP to extract contrastive features with dimension 256. Here, we further analyze how the dimension and the depth influence Core-tuning. The results on ImageNet20 are reported in Figure 2, where the fine-tuning performance of Core-tuning can be further improved by changing the feature dimension to 128 and the depth to 3. Note that the best dimension and depth of the projection head may vary on different datasets, but the default setting (*i.e.*, dimension 256 and depth 2) is enough to obtain consistently good performance.

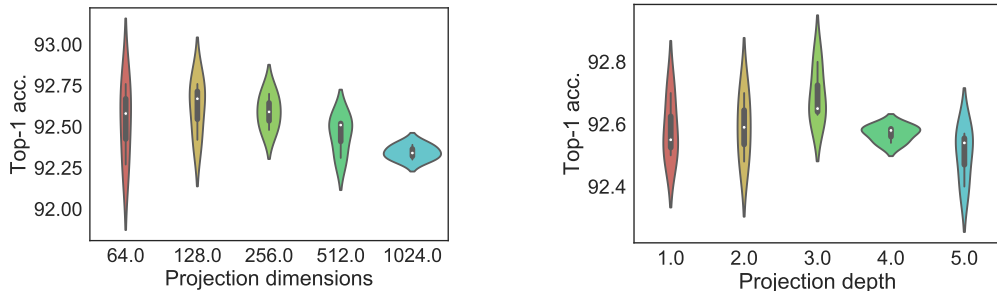

Figure 2: Analysis of the projection dimension and the projection depth in Core-tuning on ImageNet20 based on MoCo-v2 pre-trained ResNet-50. Each run tests one parameter and fixes others. Best viewed in color.

### E.2 Analysis of Loss and Mixup Hyper-Parameters

This appendix discusses the influence of the loss trade-off parameter  $\eta$  and the mixup sampling factor  $\alpha$  on Core-tuning based on the ImageNet20 dataset. Each run tests one parameter and fixes others. As shown in Figure 3, when  $\eta=0.1$  and  $\alpha=1$ , Core-tuning performs slightly better on ImageNet20. Note that the best  $\eta$  and  $\alpha$  can be different on diverse datasets.

### E.3 Analysis of Temperature Factor

Following the implementation of the supervised contrastive loss [25], we set the temperature factor  $\tau$  to 0.07 for Core-tuning by default. In this section, we further analyze the influence of  $\tau$  on Core-tuning when fine-tuning MoCo-v2 pre-trained models on ImageNet20. As shown in Figure 3, when  $\tau$  is small (*e.g.*, 0.01 or 0.07), Core-tuning performs slightly better on ImageNet20. The potential reason is that a small temperature parameter implicitly helps the method to learn hard positive/negative pairs [?], which are more informative and beneficial to contrastive learning. Note that the best  $\tau$  can be different on different datasets, but the default setting (*i.e.*,  $\tau = 0.07$ ) is enough to achieve comparable performance.

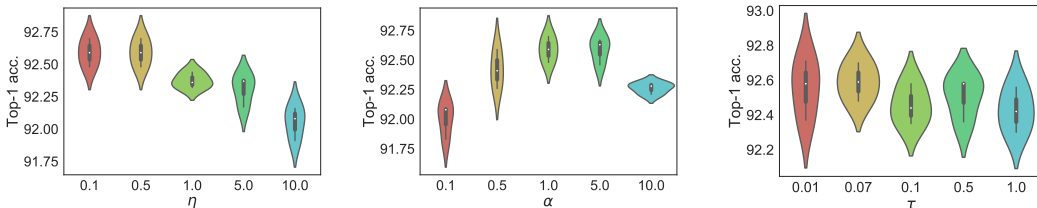

Figure 3: Analysis of  $\eta$ ,  $\alpha$  and the temperature factor in Core-tuning on ImageNet20 based on MoCo-v2 pre-trained ResNet-50. Each run tests one factor and fixes others. Best viewed in color.

#### E.4 Analysis of Hard Pair Thresholds

In our hardness-directed mixup strategy, to make the generated negative pairs closer to negative pairs, we clip  $\lambda \sim \text{Beta}(\alpha, \alpha)$  by  $\lambda \geq \lambda_n$  when generating hard negative pairs. In our experiments, we set the threshold  $\lambda_n = 0.8$ . In this appendix, we analyze the influences of the negative pair threshold  $\lambda_n$ . Meanwhile, although we do not constrain hard positive generation, we also analyze the potential positive pair threshold  $\lambda_p$ . The results on ImageNet20 are reported in Table 3. On the one hand,  $\lambda_n$  satisfies our expectation that the generated hard negative pairs should be closer to negatives, *i.e.*, a larger  $\lambda_n$  can lead to better performance. On the other hand, we find when no crop is conducted for hard positive generation (*i.e.*,  $\lambda_p=0$ ), the performance is slightly better. We conjecture that since the generated hard positives are located in the borderline area between positives and negatives, allowing the generated hard positives to close to negatives may have a margin effect on contrastive learning and thus boosts performance. Despite this, Core-tuning with a large  $\lambda_p$  performs similarly well.

Table 13: Threshold analysis for hard pair generation in Core-tuning on ImageNet20 based on MoCo-v2 pre-trained ResNet-50. Each run tests one parameter and fixes another one to 0.8.

| Thresholds                          | 0     | 0.2   | 0.4   | 0.6   | 0.8   |
|-------------------------------------|-------|-------|-------|-------|-------|
| Negative pair threshold $\lambda_n$ | 91.55 | 91.94 | 92.19 | 92.36 | 92.59 |
| Positive pair threshold $\lambda_p$ | 92.73 | 92.68 | 92.64 | 92.60 | 92.59 |

#### E.5 Relationship Between Pre-Training and Fine-Tuning Accuracies

We further explore the relationship between ImageNet performance and Core-tuning fine-tuning performance on Caltech-101 for various contrastive self-supervised models. Here, the ImageNet performance of a contrastive self-supervised model is obtained by training a new linear classifier on the frozen pre-trained representation and then evaluate the model on the ImageNet test set. For convenience, we directly follow the ImageNet performance reported in the original paper of the corresponding methods. As shown in Figure 4, the fine-tuning result of each contrastive self-supervised model on Caltech-101 is highly correlated with the model result on ImageNet. This implies that the ImageNet performance can be a good predictor for the fine-tuning performance of contrastive self-supervised models. Such a finding is consistent with supervised pre-trained models [27]. Even so, note that the correlation is not perfect, where a contrastive pre-trained model with better ImageNet performance does not necessarily mean better fine-tuning performance, *e.g.*, SimCLR-v2 vs MoCo-v2.

#### E.6 Effectiveness of Hard Pair Generation for Contrastive Fine-Tuning

In our proposed Core-tuning, we use all the generated positive sample pairs and the original samples as positive pairs for contrastive fine-tuning. In this appendix, to better evaluate the effectiveness of hard pair generation, we do not use original data as positive pairs but only use the generated hard positive pairs for contrastive learning. As shown in Table 14, only using the generated hard positive pairs for contrastive learning is enough to obtain comparable performance. Such results further verify the effectiveness of our hardness-directed mixup strategy as well as the importance of hard positive pairs for contrastive fine-tuning.

Table 14: Comparisons with only using the generating hard positive pairs for contrast on CIFAR10.

| Pre-training | Fine-tuning | The used positive pairs for contrast?  | Top-1 accuracy |
|--------------|-------------|----------------------------------------|----------------|
| MoCo-v2 [8]  | CE-tuning   | ×                                      | 94.70+/-0.39   |
| MoCo-v2 [8]  | Core-tuning | only the generated hard positive pairs | 97.31+/-0.09   |
| MoCo-v2 [8]  | Core-tuning | all positive pairs                     | 97.31+/-0.10   |

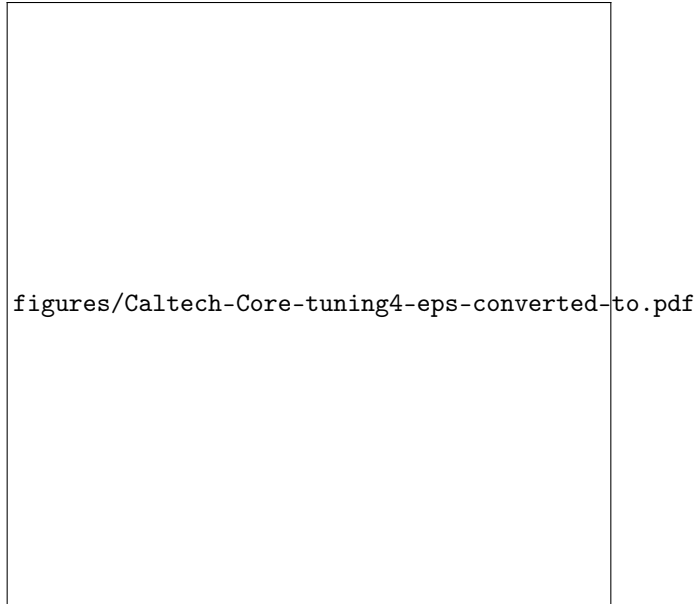

Figure 4: The relationship between ImageNet performance and Core-tuning fine-tuning performance on Caltech-101 for contrastive self-supervised ResNet-50 models. Better viewed in color.

### E.7 Effectiveness of Smooth Classifier Learning

In Core-tuning, to better exploit the learned discriminative feature space by contrastive fine-tuning, we use the mixed samples for classifier training, so that the classifier can be more smooth and far away from the original training data. In this appendix, to better evaluate the effectiveness of smooth classifier learning, we compare Core-tuning with a variant that does not use the mixed data for classifier learning. As shown in Table 15, smooth classifier learning contributes to the fine-tuning performance of contrastive self-supervised models on downstream tasks. The results demonstrate the effectiveness of smooth classifier learning and also show its importance in Core-tuning.

Table 15: Influence of smooth classifier learning on CIFAR10.

| Pre-training | Fine-tuning | Smooth classifier learning? | Top-1 accuracy |
|--------------|-------------|-----------------------------|----------------|
| MoCo-v2 [8]  | CE-tuning   | ×                           | 94.70+/-0.39   |
| MoCo-v2 [8]  | CE-tuning   | ✓                           | 95.43+/-0.20   |
| MoCo-v2 [8]  | Core-tuning | ×                           | 96.13+/-0.11   |
| MoCo-v2 [8]  | Core-tuning | ✓                           | 97.31+/-0.10   |

## References

- [1] Malik Boudiaf, Jérôme Rony, et al. A unifying mutual information view of metric learning: cross-entropy vs. pairwise losses. In *European Conference on Computer Vision*, 2020.
- [2] Mathilde Caron, Piotr Bojanowski, Armand Joulin, and Matthijs Douze. Deep clustering for unsupervised learning of visual features. In *European Conference on Computer Vision*, 2018.
- [3] Mathilde Caron, Ishan Misra, Julien Mairal, Priya Goyal, Piotr Bojanowski, and Armand Joulin. Unsupervised learning of visual features by contrasting cluster assignments. In *Advances in Neural Information Processing Systems*, 2020.
- [4] Mathilde Caron, Hugo Touvron, Ishan Misra, Hervé Jégou, Julien Mairal, Piotr Bojanowski, and Armand Joulin. Emerging properties in self-supervised vision transformers. *arXiv*, 2021.
- [5] Liang-Chieh Chen, George Papandreou, Florian Schroff, and Hartwig Adam. Rethinking atrous convolution for semantic image segmentation. *ArXiv*, 2017.
- [6] Ting Chen, Simon Kornblith, Mohammad Norouzi, and Geoffrey Hinton. A simple framework for contrastive learning of visual representations. In *International Conference on Machine Learning*, 2020.
- [7] Ting Chen, Simon Kornblith, Kevin Swersky, Mohammad Norouzi, and Geoffrey Hinton. Big self-supervised models are strong semi-supervised learners. In *Advances in Neural Information Processing Systems*, 2020.
- [8] Xinlei Chen, Haoqi Fan, Ross Girshick, and Kaiming He. Improved baselines with momentum contrastive learning. *ArXiv*, 2020.
- [9] Xinyang Chen, Sinan Wang, et al. Catastrophic forgetting meets negative transfer: Batch spectral shrinkage for safe transfer learning. In *Advances in Neural Information Processing Systems*, 2019.
- [10] Mircea Cimpoi, Subhransu Maji, Iasonas Kokkinos, Sammy Mohamed, and Andrea Vedaldi. Describing textures in the wild. In *Computer Vision and Pattern Recognition*, pages 3606–3613, 2014.
- [11] Jia Deng, Wei Dong, Richard Socher, Li-Jia Li, Kai Li, and Li Fei-Fei. Imagenet: A large-scale hierarchical image database. In *Computer Vision and Pattern Recognition*, pages 248–255, 2009.
- [12] Qi Dou, Daniel C Castro, Konstantinos Kamnitsas, and Ben Glocker. Domain generalization via model-agnostic learning of semantic features. In *Advances in Neural Information Processing Systems*, 2019.
- [13] Linus Ericsson, Henry Gouk, and Timothy M Hospedales. How well do self-supervised models transfer? In *IEEE Computer Vision and Pattern Recognition*, pages 5414–5423, 2021.
- [14] Chen Fang, Ye Xu, et al. Unbiased metric learning: On the utilization of multiple datasets and web images for softening bias. In *International Conference on Computer Vision*, 2013.
- [15] Li Fei-Fei, Rob Fergus, and Pietro Perona. Learning generative visual models from few training examples: An incremental bayesian approach tested on 101 object categories. In *Computer Vision and Pattern Recognition Workshop*, 2004.
- [16] Spyros Gidaris, Praveer Singh, and Nikos Komodakis. Unsupervised representation learning by predicting image rotations. In *International Conference on Learning Representations*, 2018.
- [17] Jean-Bastien Grill, Florian Strub, Florent Altché, Corentin Tallec, Pierre Richemond, Elena Buchatskaya, Carl Doersch, Bernardo Pires, Zhaohan Guo, Mohammad Azar, et al. Bootstrap your own latent: A new approach to self-supervised learning. In *Neural Information Processing Systems*, 2020.
- [18] Beliz Gunel, Jingfei Du, Alexis Conneau, and Ves Stoyanov. Supervised contrastive learning for pre-trained language model fine-tuning. In *International Conference on Learning Representations*, 2021.
- [19] Ben Harwood, Vijay Kumar BG, Gustavo Carneiro, Ian Reid, and Tom Drummond. Smart mining for deep metric learning. In *International Conference on Computer Vision*, pages 2821–2829, 2017.
- [20] Kaiming He, Haoqi Fan, Yuxin Wu, Saining Xie, and Ross Girshick. Momentum contrast for unsupervised visual representation learning. In *Computer Vision and Pattern Recognition*, 2020.
- [21] Jeremy Howard. The imagenette and imagewoof datasets, 2020.
- [22] Dapeng Hu, Qizhengqiu Lu, Lanqing Hong, Hailin Hu, Yifan Zhang, Zhenguo Li, Alfred Shen, and Jiashi Feng. How well self-supervised pre-training performs with streaming data? *ArXiv*, 2021.

- [23] Yannis Kalantidis, Mert Bulent Sariyildiz, Noe Pion, Philippe Weinzaepfel, and Diane Larlus. Hard negative mixing for contrastive learning. In *Advances in Neural Information Processing Systems*, 2020.
- [24] Guoliang Kang, Lu Jiang, Yi Yang, and Alexander G Hauptmann. Contrastive adaptation network for unsupervised domain adaptation. In *Computer Vision and Pattern Recognition*, 2019.
- [25] Prannay Khosla, Piotr Teterwak, et al. Supervised contrastive learning. In *Advances in Neural Information Processing Systems*, 2020.
- [26] Sungnyun Kim, Gihun Lee, Sangmin Bae, and Se-Young Yun. Mixco: Mix-up contrastive learning for visual representation. *ArXiv*, 2020.
- [27] Simon Kornblith, Jonathon Shlens, and Quoc V Le. Do better imagenet models transfer better? In *Computer Vision and Pattern Recognition*, pages 2661–2671, 2019.
- [28] Jonathan Krause, Jia Deng, Michael Stark, and Li Fei-Fei. Collecting a large-scale dataset of fine-grained cars. 2013.
- [29] Alex Krizhevsky, Geoffrey Hinton, et al. Learning multiple layers of features from tiny images. 2009.
- [30] Gustav Larsson, Michael Maire, and Gregory Shakhnarovich. Learning representations for automatic colorization. In *European Conference on Computer Vision*, pages 577–593, 2016.
- [31] Kibok Lee, Yian Zhu, Kihyuk Sohn, et al. i-mix: A strategy for regularizing contrastive representation learning. In *International Conference on Learning Representations*, 2021.
- [32] Da Li, Yongxin Yang, Yi-Zhe Song, and Timothy M Hospedales. Deeper, broader and artier domain generalization. In *International Conference on Computer Vision*, pages 5542–5550, 2017.
- [33] Xingjian Li, Haoyi Xiong, et al. Delta: Deep learning transfer using feature map with attention for convolutional networks. In *International Conference on Learning Representations*, 2019.
- [34] Xingjian Li, Haoyi Xiong, et al. Rifle: Backpropagation in depth for deep transfer learning through re-initializing the fully-connected layer. In *International Conference on Machine Learning*, 2020.
- [35] Xuhong Li, Yves Grandvalet, and Franck Davoine. Explicit inductive bias for transfer learning with convolutional networks. In *International Conference on Machine Learning*, 2018.
- [36] Tsung-Yi Lin, Priya Goyal, Ross Girshick, Kaiming He, and Piotr Dollár. Focal loss for dense object detection. In *International Conference on Computer Vision*, pages 2980–2988, 2017.
- [37] Weiyang Liu, Yandong Wen, Zhiding Yu, and Meng Yang. Large-margin softmax loss for convolutional neural networks. In *International Conference on Machine Learning*, pages 507–516, 2016.
- [38] Aleksander Madry, Aleksandar Makelov, Ludwig Schmidt, Dimitris Tsipras, and Adrian Vladu. Towards deep learning models resistant to adversarial attacks. In *International Conference on Learning Representations*, 2018.
- [39] Subhansu Maji, Esa Rahtu, Juho Kannala, Matthew Blaschko, and Andrea Vedaldi. Fine-grained visual classification of aircraft. *ArXiv*, 2013.
- [40] Puneet Mangla, Nupur Kumari, Abhishek Sinha, Mayank Singh, Balaji Krishnamurthy, and Vineeth N Balasubramanian. Charting the right manifold: Manifold mixup for few-shot learning. In *Winter Conference on Applications of Computer Vision*, pages 2218–2227, 2020.
- [41] Ishan Misra and Laurens van der Maaten. Self-supervised learning of pretext-invariant representations. In *Computer Vision and Pattern Recognition*, pages 6707–6717, 2020.
- [42] Maria-Elena Nilsback and Andrew Zisserman. Automated flower classification over a large number of classes. In *Indian Conference on Computer Vision, Graphics & Image Processing*, 2008.
- [43] Aaron van den Oord, Yazhe Li, and Oriol Vinyals. Representation learning with contrastive predictive coding. *ArXiv*, 2018.
- [44] Omkar M Parkhi, Andrea Vedaldi, Andrew Zisserman, and CV Jawahar. Cats and dogs. In *Computer Vision and Pattern Recognition*, 2012.
- [45] Zhiqiang Shen, Zechun Liu, Zhuang Liu, Marios Savvides, and Trevor Darrell. Rethinking image mixture for unsupervised visual representation learning. *ArXiv*, 2020.

- [46] Christian Szegedy, Wojciech Zaremba, Ilya Sutskever, Joan Bruna, Dumitru Erhan, Ian Goodfellow, and Rob Fergus. Intriguing properties of neural networks. In *International Conference on Learning Representations*, 2014.
- [47] Yonglong Tian, Chen Sun, Ben Poole, Dilip Krishnan, Cordelia Schmid, and Phillip Isola. What makes for good views for contrastive learning. In *Advances in Neural Information Processing Systems*, 2020.
- [48] Hugo Touvron, Matthieu Cord, Matthijs Douze, Francisco Massa, Alexandre Sablayrolles, and Hervé Jégou. Training data-efficient image transformers & distillation through attention. In *International Conference on Machine Learning*, pages 10347–10357, 2021.
- [49] Dimitris Tsipras, Shibani Santurkar, Logan Engstrom, Alexander Turner, and Aleksander Madry. Robustness may be at odds with accuracy. In *International Conference on Learning Representations*, 2019.
- [50] Grant Van Horn, Oisín Mac Aodha, Yang Song, Yin Cui, Chen Sun, Alex Shepard, Hartwig Adam, Pietro Perona, and Serge Belongie. The inaturalist species classification and detection dataset. In *Computer Vision and Pattern Recognition*, pages 8769–8778, 2018.
- [51] Hemanth Venkateswara, Jose Eusebio, Shayok Chakraborty, and Sethuraman Panchanathan. Deep hashing network for unsupervised domain adaptation. In *Computer Vision and Pattern Recognition*, 2017.
- [52] Vikas Verma, Alex Lamb, Christopher Beckham, Amir Najafi, Ioannis Mitliagkas, David Lopez-Paz, and Yoshua Bengio. Manifold mixup: Better representations by interpolating hidden states. In *International Conference on Machine Learning*, pages 6438–6447, 2019.
- [53] Tongzhou Wang and Phillip Isola. Understanding contrastive representation learning through alignment and uniformity on the hypersphere. In *International Conference on Machine Learning*, 2020.
- [54] Xinlong Wang, Rufeng Zhang, Chunhua Shen, Tao Kong, and Lei Li. Dense contrastive learning for self-supervised visual pre-training. In *IEEE Computer Vision and Pattern Recognition*, pages 3024–3033, 2021.
- [55] Yandong Wen, Kaipeng Zhang, Zhifeng Li, and Yu Qiao. A discriminative feature learning approach for deep face recognition. In *European Conference on Computer Vision*, pages 499–515, 2016.
- [56] Chao-Yuan Wu, R Manmatha, Alexander J Smola, and Philipp Krahenbuhl. Sampling matters in deep embedding learning. In *International Conference on Computer Vision*, pages 2840–2848, 2017.
- [57] Mike Wu, Milan Mosse, Chengxu Zhuang, Daniel Yamins, and Noah Goodman. Conditional negative sampling for contrastive learning of visual representations. In *International Conference on Learning Representations*, 2021.
- [58] Zhirong Wu, Yuanjun Xiong, Stella X Yu, and Dahua Lin. Unsupervised feature learning via non-parametric instance discrimination. In *Computer Vision and Pattern Recognition*, 2018.
- [59] Saining Xie, Ross Girshick, Piotr Dollár, Zhuowen Tu, and Kaiming He. Aggregated residual transformations for deep neural networks. In *Computer Vision and Pattern Recognition*, 2017.
- [60] Xueting Yan, Ishan Misra, Abhinav Gupta, Deepti Ghadiyaram, and Dhruv Mahajan. Clusterfit: Improving generalization of visual representations. In *Computer Vision and Pattern Recognition*, 2020.
- [61] Yao-Yuan Yang, Cyrus Rashtchian, Hongyang Zhang, Ruslan Salakhutdinov, and Kamalika Chaudhuri. A closer look at accuracy vs. robustness. In *Advances in Neural Information Processing Systems*, 2020.
- [62] Xiaohang Zhan, Ziwei Liu, Ping Luo, Xiaoou Tang, and Chen Change Loy. Mix-and-match tuning for self-supervised semantic segmentation. In *AAAI Conference on Artificial Intelligence*, 2018.
- [63] Hongyang Zhang, Yaodong Yu, Jiantao Jiao, Eric Xing, Laurent El Ghaoui, and Michael Jordan. Theoretically principled trade-off between robustness and accuracy. In *International Conference on Machine Learning*, 2019.
- [64] Hongyi Zhang, Moustapha Cisse, Yann N Dauphin, and David Lopez-Paz. mixup: Beyond empirical risk minimization. In *International Conference on Learning Representations*, 2018.
- [65] Jingfeng Zhang, Jianing Zhu, Gang Niu, Bo Han, Masashi Sugiyama, and Mohan Kankanhalli. Geometry-aware instance-reweighted adversarial training. In *International Conference on Learning Representations*, 2021.
- [66] Linjun Zhang, Zhun Deng, Kenji Kawaguchi, Amirata Ghorbani, and James Zou. How does mixup help with robustness and generalization? In *International Conference on Learning Representations*, 2021.

- [67] Yifan Zhang, Bryan Hooi, Lanqing Hong, and Jiashi Feng. Test-agnostic long-tailed recognition by test-time aggregating diverse experts with self-supervision. *ArXiv*, 2021.
- [68] Yifan Zhang, Bingyi Kang, Bryan Hooi, Shuicheng Yan, and Jiashi Feng. Deep long-tailed learning: A survey. *ArXiv*, 2021.
- [69] Nanxuan Zhao, Zhirong Wu, Rynson WH Lau, and Stephen Lin. What makes instance discrimination good for transfer learning? In *International Conference on Learning Representations*, 2021.
- [70] Peilin Zhao, Yifan Zhang, Min Wu, Steven CH Hoi, Mingkui Tan, and Junzhou Huang. Adaptive cost-sensitive online classification. *IEEE Transactions on Knowledge and Data Engineering*, 2018.
- [71] Jincheng Zhong, Ximei Wang, Zhi Kou, Jianmin Wang, and Mingsheng Long. Bi-tuning of pre-trained representations. *Arxiv*, 2021.



## Checklist

1. For all authors...
  - (a) Do the main claims made in the abstract and introduction accurately reflect the paper's contributions and scope? [Yes]
  - (b) Did you describe the limitations of your work? [Yes] Please refer to Section 6.
  - (c) Did you discuss any potential negative societal impacts of your work? [N/A] This is a fundamental research that does not have particular negative social impacts.
  - (d) Have you read the ethics review guidelines and ensured that your paper conforms to them? [Yes]
2. If you are including theoretical results...
  - (a) Did you state the full set of assumptions of all theoretical results? [Yes]
  - (b) Did you include complete proofs of all theoretical results? [Yes] Please refer to Appendix. A.
3. If you ran experiments...
  - (a) Did you include the code, data, and instructions needed to reproduce the main experimental results (either in the supplemental material or as a URL)? [Yes] Please refer the submitted source code, while the used benchmark datasets require being downloaded from their official websites.
  - (b) Did you specify all the training details (e.g., data splits, hyper-parameters, how they were chosen)? [Yes] Please refer to Section 5, Appendix C and the provided codes.
  - (c) Did you report error bars (e.g., with respect to the random seed after running experiments multiple times)? [Yes] Please refer to Appendices D.3 and D.4.
  - (d) Did you include the total amount of compute and the type of resources used (e.g., type of GPUs, internal cluster, or cloud provider)? [Yes] Please refer to Section 5.2 and Appendix C for details on different downstream tasks.
4. If you are using existing assets (e.g., code, data, models) or curating/releasing new assets...
  - (a) If your work uses existing assets, did you cite the creators? [Yes] Please refer to Section 5 and Appendix C for details on different downstream tasks.
  - (b) Did you mention the license of the assets? [N/A] Both the used benchmark datasets and pre-trained models are publicly available.
  - (c) Did you include any new assets either in the supplemental material or as a URL? [Yes] The source code of Core-tuning is available at: <https://github.com/Vanint/Core-tuning>.
  - (d) Did you discuss whether and how consent was obtained from people whose data you're using/curating? [N/A] These datasets are open-source benchmark datasets.
  - (e) Did you discuss whether the data you are using/curating contains personally identifiable information or offensive content? [N/A] These datasets are open-source benchmark datasets.
5. If you used crowdsourcing or conducted research with human subjects...
  - (a) Did you include the full text of instructions given to participants and screenshots, if applicable? [N/A]
  - (b) Did you describe any potential participant risks, with links to Institutional Review Board (IRB) approvals, if applicable? [N/A]
  - (c) Did you include the estimated hourly wage paid to participants and the total amount spent on participant compensation? [N/A]
